# Supplementary material
Source: Springer Nature journal article supplement (https://www.springermedizin.de/resource/supplementary/12885_2010_2715_MOESM1_ESM.pdf/9461866)

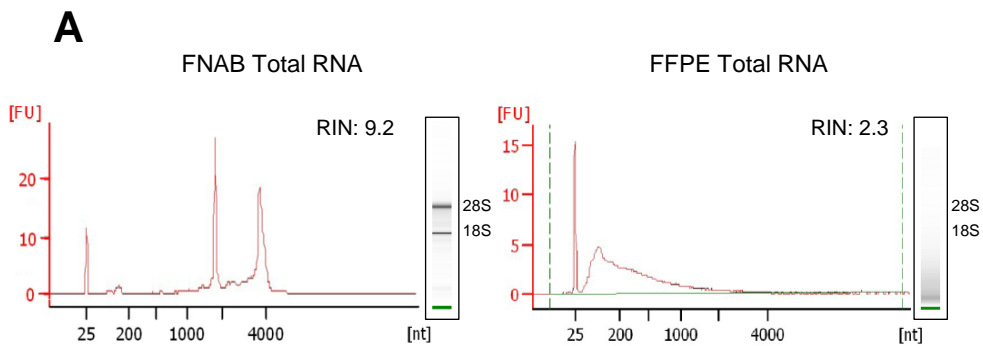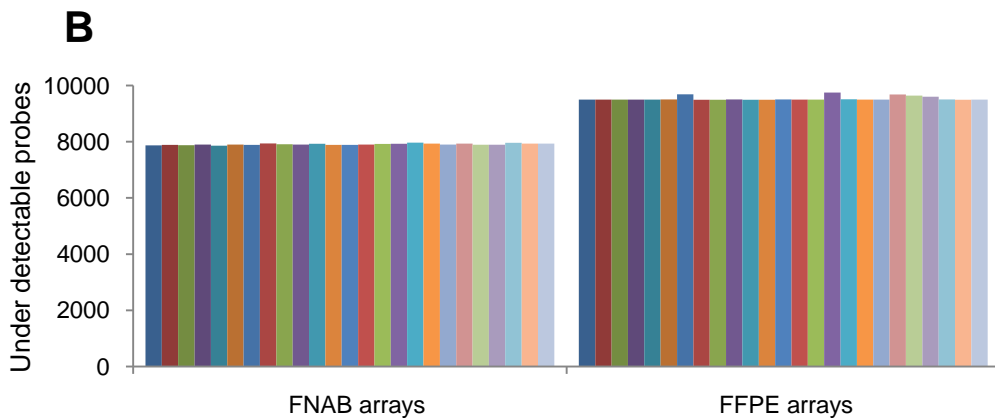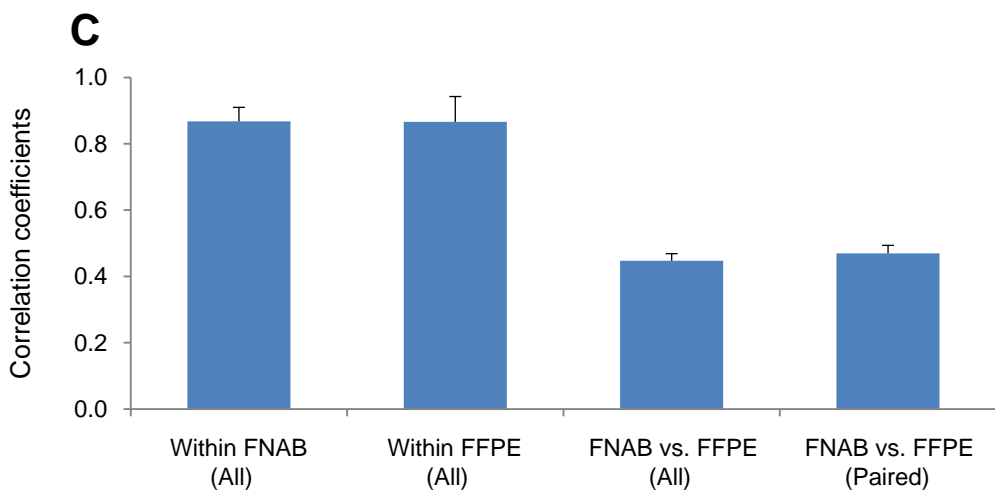

Supplement: MOESM1 [file 9461866]
